# Supplementary material
Source: HighWire-hosted journal article supplement (https://jnis.bmj.com/content/jnis-2022-019682)
Supplement: inline-supplementary-material-1 [file inline-supplementary-material-1.pdf]

Figure S1. Summary of missing data.

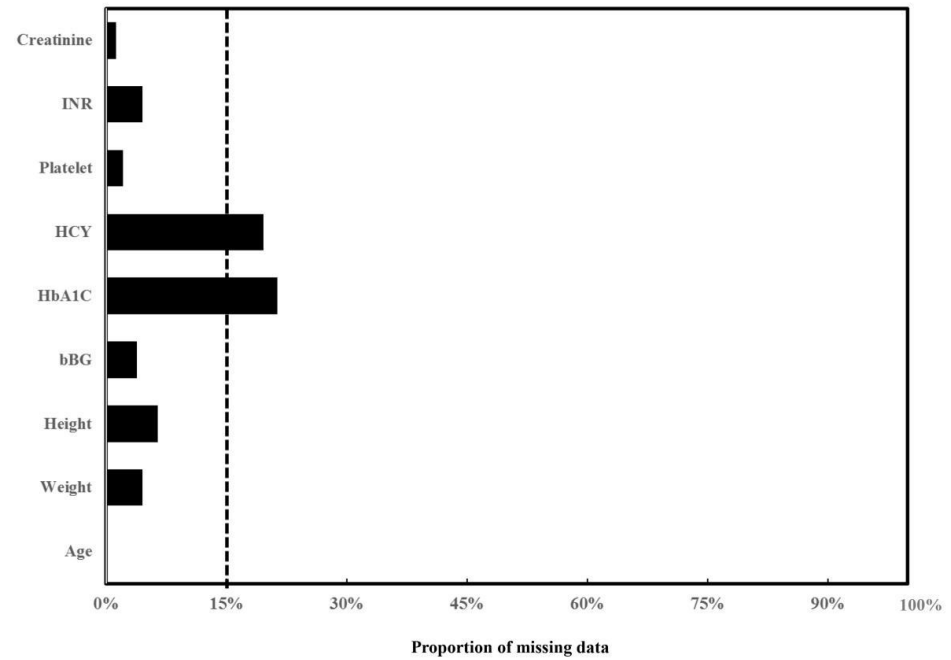

Black bars indicate variables with missing data for more than 15% of patients. INR, international normalized ratio; HCY, homocysteine; HbA1C, glycated hemoglobin; bBG, baseline blood glucose.

Figure S2. Protocol flow chart in this study.

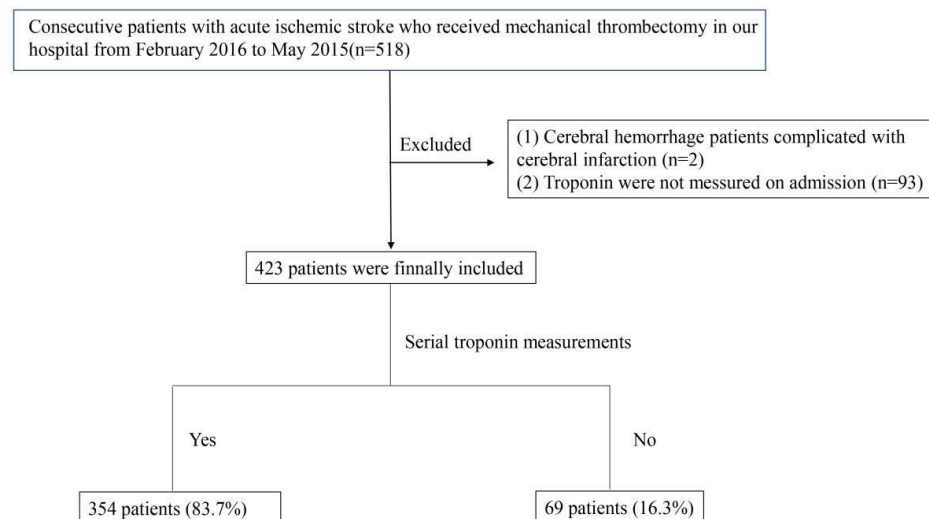

Table S1 Clinical characteristics and mortality of patients, stratified by the presence of hs-cTnI measurement before MT

|                              | hs-cTnI measurement before MT |           | <i>P</i> |
|------------------------------|-------------------------------|-----------|----------|
|                              | Yes (n=423)                   | No (n=95) |          |
| Age >70, n (%)               | 246(58.2)                     | 46(48.4)  | 0.084    |
| Male, n (%)                  | 248(58.6)                     | 58(61.1)  | 0.664    |
| <b>Vascular risk factors</b> |                               |           |          |

|                           |             |             |                  |
|---------------------------|-------------|-------------|------------------|
| Hypertension, n(%)        | 275(65.0)   | 60(63.2)    | 0.733            |
| Diabetes mellitus, n(%)   | 116(27.4)   | 14(14.7)    | <b>0.010</b>     |
| Current smoking, n(%)     | 75(17.7)    | 18(18.9)    | 0.780            |
| <b>Comorbidities</b>      |             |             |                  |
| AF, n(%)                  | 212(50.1)   | 44(46.3)    | 0.503            |
| CAD, n(%)                 | 42(9.9)     | 7(7.4)      | 0.441            |
| Previous stroke, n(%)     | 66(15.6)    | 16(16.8)    | 0.765            |
| <b>Treatment status</b>   |             |             |                  |
| OTA, min (IQR)            | 106(60-240) | 215(78-335) | <b>0.001</b>     |
| Transfers, n(%)           | 56(13.2)    | 52(54.7)    | <b>&lt;0.001</b> |
| Use of IV rtPA, n(%)      | 115(27.2)   | 21(22.1)    | 0.309            |
| Poor reperfusion, n(%)    | 84(19.9)    | 22(23.2)    | 0.471            |
| <b>NIHSS on admission</b> |             |             |                  |
| 0-8*, n(%)                | 59(13.9)    | 9(9.5)      | 0.411            |
| 9-16, n(%)                | 149(35.2)   | 32(33.7)    |                  |
| >16, n(%)                 | 215(50.8)   | 54(56.8)    |                  |
| <b>Mortality†, n%</b>     | 119(30.7)   | 18(20.7)    | 0.063            |

\*control group

†data were available from 388 patients in the “Yes” group and 87 patients in the “No” group considering the patients lost to follow-up.

hs-cTnI, high-sensitivity cardiac troponin; MT, mechanical thrombectomy; AF, atrial fibrillation; CAD, coronary artery disease; OTA, onset-to-admission time; IQR, interquartile range; IV rtPA, intravenous recombinant tissue plasminogen activator; NIHSS, National Institutes of Health Stroke Scale score.

Table S2. Clinical characteristics and mortality of patients, stratified by the presence of serial measurements in hs-cTnI

|                | Serial measurements in hs-cTnI |           | P     |
|----------------|--------------------------------|-----------|-------|
|                | Yes (n=354)                    | No (n=69) |       |
| Age >70, n (%) | 203(57.3)                      | 43(62.3)  | 0.444 |

|                                      |                    |                    |              |
|--------------------------------------|--------------------|--------------------|--------------|
| Male, n (%)                          | 207(58.5)          | 41(59.4)           | 0.884        |
| <b>Vascular risk factors</b>         |                    |                    |              |
| Hypertension, n(%)                   | 230(65.0)          | 45(65.2)           | 0.969        |
| Diabetes mellitus, n(%)              | 98(27.7)           | 18(26.1)           | 0.786        |
| Current smoking, n(%)                | 58(16.4)           | 17(24.6)           | 0.101        |
| <b>Comorbidities</b>                 |                    |                    |              |
| AF, n(%)                             | 179(50.6)          | 33(47.8)           | 0.677        |
| CAD, n(%)                            | 39(11.0)           | 3(4.3)             | 0.090        |
| Previous stroke, n(%)                | 62(17.5)           | 4(5.8)             | <b>0.014</b> |
| <b>Treatment status</b>              |                    |                    |              |
| Previous antithrombotic therapy, n%  | 62(17.5)           | 10(14.5)           | 0.541        |
| OTA, min (IQR)                       | 105(60-240)        | 120(59-278)        | 0.531        |
| Transfers, n(%)                      | 48(13.6)           | 8(11.6)            | 0.659        |
| Use of IV rtPA, n(%)                 | 94(26.6)           | 21(30.4)           | 0.507        |
| Poor reperfusion, n(%)               | 65(18.4)           | 19(27.5)           | 0.081        |
| Dual antiplatelet therapy            | 4(5.6)             | 46(13.1)           | 0.071        |
| <b>NIHSS on admission</b>            |                    |                    |              |
| 0-8*, n(%)                           | 45(12.7)           | 14(20.3)           | 0.071        |
| 9-16, n(%)                           | 132(37.3)          | 17(24.6)           |              |
| >16, n(%)                            | 177(50.0)          | 38(55.1)           |              |
| <b>Laboratory test</b>               |                    |                    |              |
| hs-cTnI elevation on admission, n%   | 62(17.5)           | 10(14.5)           | 0.541        |
| Baseline blood glucose, mmol/L (IQR) | 7.10(6.10-8.70)    | 6.80(5.90-8.60)    | 0.379        |
| HbA1c, % (IQR)                       | 5.90(5.50-6.83)    | 6.00(5.60-7.70)    | 0.292        |
| HCY, μmol/L (IQR)                    | 13.60(10.28-18.90) | 12.88(10.05-16.93) | 0.279        |

|                                      |                 |                 |       |
|--------------------------------------|-----------------|-----------------|-------|
| Platelet, 10 <sup>9</sup> /L (IQR)   | 193(155-230)    | 184(154-235)    | 0.843 |
| INR (IQR)                            | 1.02(0.95-1.09) | 1.04(0.96-1.10) | 0.300 |
| LDL-C mmol/L (IQR)                   | 2.53(1.91-3.32) | 2.46(1.94-2.93) | 0.449 |
| eGFR, L/min/1.73m <sup>2</sup> (IQR) | 62.2(45.0-79.5) | 59.3(47.5-72.5) | 0.546 |
| <b>Stroke location</b>               |                 |                 |       |
| posterior circulation, n%            | 117(33.1)       | 21(30.4)        | 0.672 |
| Insula <sup>†</sup> , n%             | 63(18.3)        | 9(15.3)         | 0.577 |
| <b>ICH<sup>†</sup>, n%</b>           | 111(32.2)       | 15(25.4)        | 0.301 |
| <b>sICH<sup>†</sup>, n%</b>          | 91(26.4)        | 19(32.2)        | 0.353 |
| <b>Mortality<sup>‡</sup>, n%</b>     | 94(29.0)        | 25(39.1)        | 0.111 |

hs-cTnI, high-sensitivity cardiac troponin; AF, atrial fibrillation; CAD, coronary artery disease; OTA, onset-to-admission time; IQR, interquartile range; IV rtPA, intravenous recombinant tissue plasminogen activator; NIHSS, National Institutes of Health Stroke Scale score; HbA1c, glycated hemoglobin; HCY, homocysteine; INR, international normalized ratio; LDL-C, low-density lipoprotein; eGFR, estimated glomerular filtration rate; ICH, Intracranial hemorrhage; sICH, symptomatic intracranial hemorrhage.

\*control group

<sup>†</sup> Data were available in 404 patients.

<sup>‡</sup> data were available in 388 patients

Table S3 Clinical characteristics and mortality of patients, stratified by the presence of Insula involvement

|                              | Insula involvement |            | P            |
|------------------------------|--------------------|------------|--------------|
|                              | Yes (n=72)         | No (n=332) |              |
| Age >70, n (%)               | 46(63.9)           | 189(56.9)  | 0.278        |
| Male, n (%)                  | 43(59.7)           | 192(57.8)  | 0.768        |
| <b>Vascular risk factors</b> |                    |            |              |
| Hypertension, n(%)           | 38(52.8)           | 221(66.6)  | <b>0.027</b> |
| Diabetes mellitus, n(%)      | 19(26.4)           | 93(28.0)   | 0.780        |
| Current smoking, n(%)        | 13(18.1)           | 58(17.5)   | 0.906        |

**Comorbidities**

|                       |          |           |       |
|-----------------------|----------|-----------|-------|
| AF, n(%)              | 43(59.7) | 163(49.1) | 0.102 |
| CAD, n(%)             | 7(9.7)   | 32(9.6)   | 0.983 |
| Previous stroke, n(%) | 14(19.4) | 50(15.1)  | 0.356 |

AF, atrial fibrillation; CAD, coronary artery disease;

Table S4. Clinical characteristics and mortality according to hs-cTnI on admission.

|                                     | hs-cTnI elevation before MT |             | P            |
|-------------------------------------|-----------------------------|-------------|--------------|
|                                     | Yes (n=72)                  | No (n=351)  |              |
| Age >70, n (%)                      | 53(73.6)                    | 193(55.0)   | 0.004        |
| Male, n (%)                         | 35(48.6)                    | 213(60.7)   | 0.058        |
| <b>Vascular risk factors</b>        |                             |             |              |
| Hypertension, n(%)                  | 42(58.3)                    | 233(66.4)   | 0.192        |
| Diabetes mellitus, n(%)             | 21(29.2)                    | 95(27.1)    | 0.716        |
| Current smoking, n(%)               | 7(9.7)                      | 68(19.4)    | 0.051        |
| <b>Comorbidities</b>                |                             |             |              |
| AF, n(%)                            | 48(66.7)                    | 164(46.7)   | <b>0.002</b> |
| CAD, n(%)                           | 13(18.1)                    | 29(8.3)     | <b>0.011</b> |
| Previous stroke, n(%)               | 12(16.7)                    | 54(15.4)    | 0.785        |
| <b>Treatment status</b>             |                             |             |              |
| Previous antithrombotic therapy, n% | 19(26.4)                    | 53(15.1)    | <b>0.020</b> |
| OTA, min (IQR)                      | 145(58-275)                 | 105(60-240) | 0.564        |
| Transfers, n(%)                     | 9(12.5)                     | 47(13.4)    | 0.839        |
| Use of IV rtPA, n(%)                | 14(19.4)                    | 101(28.8)   | 0.105        |
| Poor reperfusion, n(%)              | 19(26.4)                    | 65(18.5)    | 0.127        |
| <b>NIHSS on admission</b>           |                             |             |              |

|                                              |                    |                    |                  |
|----------------------------------------------|--------------------|--------------------|------------------|
| 0-8*, n(%)                                   | 7(9.7)             | 52(14.8)           | 0.223            |
| 9-16, n(%)                                   | 22(30.6)           | 127(36.2)          |                  |
| >16, n(%)                                    | 43(59.7)           | 172(49.0)          |                  |
| <b>Laboratory test</b>                       |                    |                    |                  |
| hs-cTnI dynamic changes <sup>†</sup> , n (%) | 36(50.0)           | 54(15.4)           | <b>&lt;0.001</b> |
| Baseline blood glucose, mmol/L (IQR)         | 7.30(6.30-8.20)    | 7.00(6.10-8.80)    | 0.643            |
| HbA1c, % (IQR)                               | 6.10(5.55-7.00)    | 5.90(5.50-6.90)    | 0.478            |
| HCY, μmol/L (IQR)                            | 15.02(10.23-21.05) | 13.30(10.12-18.21) | 0.249            |
| Platelet, 10 <sup>9</sup> /L (IQR)           | 179(151-228)       | 194(157-232)       | 0.327            |
| INR (IQR)                                    | 1.06(1.00-1.14)    | 1.02(0.95-1.09)    | <b>&lt;0.001</b> |
| LDL-C mmol/L (IQR)                           | 2.25(1.69-2.82)    | 2.58(1.97-3.33)    | <b>0.004</b>     |
| eGFR, L/min/1.73m <sup>2</sup> (IQR)         | 55.37(41.12-78.21) | 63.48(47.27-78.20) | 0.055            |
| <b>Stroke location</b>                       |                    |                    |                  |
| posterior circulation, n%                    | 20(27.8)           | 118(33.6)          | 0.336            |
| Insula <sup>‡</sup> , n%                     | 18(26.9)           | 54(16.0)           | <b>0.034</b>     |
| <b>ICH<sup>‡</sup></b>                       | 21(31.3)           | 105(31.2)          | <b>0.976</b>     |
| <b>sICH<sup>‡</sup></b>                      | 16(23.9)           | 94(27.9)           | <b>0.500</b>     |
| <b>Mortality**, n%</b>                       | 29(45.3)           | 90(27.8)           | <b>0.005</b>     |

hs-cTnI, high-sensitivity cardiac troponin; MT, mechanical thrombectomy; AF, atrial fibrillation; CAD, coronary artery disease; OTA, onset-to-admission time; IQR, interquartile range; IV rtPA, intravenous recombinant tissue plasminogen activator; NIHSS, National Institutes of Health Stroke Scale score; HbA1c, glycated hemoglobin; HCY, homocysteine; INR, international normalized ratio; LDL-C, low-density lipoprotein; eGFR, estimated glomerular filtration rate; END, early neurological deterioration; ICH, Intracranial hemorrhage; sICH, symptomatic intracranial hemorrhage.

\*control group

<sup>†</sup> Data were available in 354 patients.

<sup>‡</sup>data were available in 404 patients

\*\*data were available in 388 patients

Table S5. Kaplan-Meier survival analysis and multivariate cox regression analysis of the predictors of mortality.

|                                     | Univariate model   |              | Multivariable model 1 |        | Multivariable model 2 |        |
|-------------------------------------|--------------------|--------------|-----------------------|--------|-----------------------|--------|
|                                     | HR(95% CI)         | p            | aHR(95% CI)           | p      | aHR(95% CI)           | p      |
| Age>70, n (%)                       | 1.892(1.314-2.725) | <0.001       |                       |        |                       |        |
| Male, n (%)                         | 1.087(0.753-1.569) | 0.657        |                       |        |                       |        |
| <b>Vascular risk factors</b>        |                    |              |                       |        |                       |        |
| Hypertension, n(%)                  | 1.607(1.104-2.338) | <b>0.013</b> | 1.645(1.035-2.615)    | 0.035  | 1.747(1.066-2.862)    | 0.027  |
| Diabetes mellitus, n(%)             | 1.190(0.794-1.784) | 0.399        |                       |        |                       |        |
| Current smoking, n(%)               | 0.949(0.590-1.527) | 0.829        |                       |        |                       |        |
| <b>Comorbidities</b>                |                    |              |                       |        |                       |        |
| AF, n(%)                            | 1.064(0.741-1.529) | 0.736        |                       |        |                       |        |
| CAD, n(%)                           | 1.158(0.627-2.137) | 0.639        |                       |        |                       |        |
| Previous stroke, n(%)               | 1.030(0.625-1.697) | 0.908        |                       |        |                       |        |
| <b>Treatment status</b>             |                    |              |                       |        |                       |        |
| Previous antithrombotic therapy, n% |                    | 0.700        |                       |        |                       |        |
| OTA>270 min, n(%)                   | 0.915(0.579-1.445) | 0.703        |                       |        |                       |        |
| Transfers, n(%)                     | 1.194(0.698-2.040) | 0.518        |                       |        |                       |        |
| Use of IV rtPA, n(%)                | 0.558(0.373-0.833) | <b>0.004</b> | 0.426(0.236-0.772)    | 0.005  | 0.427(0.231-0.791)    | 0.007  |
| Poor reperfusion, n(%)              | 5.038(3.081-8.239) | <0.001       | 2.881(1.865-4.452)    | <0.001 | 2.719(1.706-4.336)    | <0.001 |
| Dual antiplatelet therapy, n(%)     | 0.452(0.265-0.774) | <b>0.004</b> |                       |        |                       |        |
| <b>NIHSS on admission</b>           |                    |              |                       |        |                       |        |
| 0-8*, n(%)                          |                    | <0.001       |                       | <0.05  |                       |        |



|                                        |                     |                  |                     |       |                     |        |
|----------------------------------------|---------------------|------------------|---------------------|-------|---------------------|--------|
| 9-16, n(%)                             | 2.979(1.045-8.494)  | <b>0.041</b>     | 2.230(0.771-6.453)  | 0.139 | 3.459(1.031-11.610) | 0.045  |
| >16, n(%)                              | 7.571(2.778-20.634) | <b>&lt;0.001</b> | 4.692(1.704-12.918) | 0.003 | 8.052(4.409-14.705) | 0.001  |
| <b>Laboratory test</b>                 |                     |                  |                     |       |                     |        |
| hs-cTnI elevation on admission, n(%)   | 1.907(1.162-3.131)  | <b>0.011</b>     |                     |       |                     |        |
| hs-cTnI dynamic changes, n (%)         | 2.618(1.610-4.256)  | <b>&lt;0.001</b> | 1.613(1.056-2.463)  | 0.027 | 1.597(1.022-2.495)  | 0.040  |
| Baseline blood glucose>7mmol/L , n (%) | 1.616(1.113-2.349)  | <b>0.012</b>     |                     |       |                     |        |
| Platelet, n (%)                        |                     | 0.175            |                     |       |                     |        |
| <100*10 <sup>9</sup> /L*               |                     |                  |                     |       |                     |        |
| 100-300*10 <sup>9</sup> /L             |                     |                  |                     |       |                     |        |
| >300*10 <sup>9</sup> /L                |                     |                  |                     |       |                     |        |
| INR, n%                                |                     | 0.545            |                     |       |                     |        |
| <0.82*                                 |                     |                  |                     |       |                     |        |
| 0.82-1.15                              |                     |                  |                     |       |                     |        |
| >1.15                                  |                     |                  |                     |       |                     |        |
| LDL-C >1.8 mmol/L, n%                  | 0.936(0.563-1.557)  | 0.800            |                     |       |                     |        |
| eGFR<60L/min/1.73m <sup>2</sup> , n%   | 1.485(1.014-2.176)  | <b>0.042</b>     |                     |       |                     |        |
| <b>Stroke location</b>                 |                     |                  |                     |       |                     |        |
| posterior circulation, n%              | 2.044(1.383-3.023)  | <b>&lt;0.001</b> | 1.577(1.044-2.384)  | 0.030 |                     |        |
| Insula lesion, n%                      |                     | 0.204            |                     |       |                     |        |
| sICH, n%                               | 3.531(2.219-5.620)  | <b>&lt;0.001</b> |                     |       | 2.259(1.447-3.529)  | <0.001 |

Model 1: adjusted for the age>70, hypertension, use of IV rtPA, dual antiplatelet therapy, Poor reperfusion, NIHSS on admission, baseline blood glucose>7mmol/L, eGFR<60L/min/1.73m<sup>2</sup>, and posterior circulation.

Model 2: adjusted for the age>70, Hypertension, use of IV rtPA, dual antiplatelet therapy, Poor reperfusion, NIHSS on admission, Baseline blood glucose>7mmol/L, eGFR<60L/min/1.73m<sup>2</sup>, posterior circulation, sICH.

HR, hazard ratio; CI, confidence interval; aHR, adjusted hazard ratio; AF, atrial fibrillation; CAD, coronary artery disease; OTA, onset-to-admission time; IV rtPA, intravenous recombinant tissue plasminogen activator; NIHSS, National Institutes of Health Stroke Scale score; hs-cTnI, high-sensitivity cardiac troponin; INR, international normalized ratio; LDL-C, low-density lipoprotein; eGFR, estimated glomerular filtration rate; sICH, symptomatic intracranial hemorrhage.

\*control group

Table S6. Comparison of Model 1 among original data and multiple imputation for multivariate cox regression analysis.

|                               | Original data |              |        | Multiple Imputation |              |        |
|-------------------------------|---------------|--------------|--------|---------------------|--------------|--------|
|                               | aHR           | 95% CI       | p      | aHR                 | 95% CI       | p      |
| Hypertension, n(%)            | 1.805         | 1.074-3.034  | 0.026  | 1.645               | 1.035-2.615  | 0.035  |
| Use of IV rtPA, n(%)          | 0.476         | 0.256-0.886  | 0.019  | 0.426               | 0.236-0.772  | 0.005  |
| Poor reperfusion, n(%)        | 2.444         | 1.505-3.968  | <0.001 | 2.881               | 1.865-4.452  | <0.001 |
| NIHSS on admission            |               |              | <0.05  |                     |              | <0.05  |
| 0-8*, n(%)                    |               |              |        |                     |              |        |
| 9-16, n(%)                    | 1.952         | 0.664-5.735  | 0.224  | 2.230               | 0.771-6.453  | 0.139  |
| >16, n(%)                     | 4.006         | 1.440-11.146 | 0.008  | 4.692               | 1.704-12.918 | 0.003  |
| hs-cTnI dynamic changes, n(%) | 1.702         | 1.082-2.679  | 0.021  | 1.613               | 1.056-2.463  | 0.027  |
| posterior circulation, n%     | 1.585         | 1.014-2.478  | 0.043  | 1.577               | 1.044-2.384  | 0.030  |

aHR, adjusted hazard ratio; CI, confidence interval; IV rtPA, use of intravenous recombinant tissue plasminogen activator; NIHSS, National Institutes of Health Stroke Scale score; hs-cTnI, high-sensitivity cardiac troponin.

\*control group

Table S7. Comparison of Model 2 among original data and multiple imputation for multivariate cox regression analysis.

|                                | Original data |              |        | Multiple Imputation |              |        |
|--------------------------------|---------------|--------------|--------|---------------------|--------------|--------|
|                                | aHR           | 95% CI       | p      | aHR                 | 95% CI       | p      |
| Hypertension, n(%)             | 1.800         | 1.052-3.081  | 0.032  | 1.747               | 1.066-2.862  | 0.027  |
| Use of IV rtPA, n(%)           | 0.452         | 0.237-0.861  | 0.016  | 0.427               | 0.231-0.791  | 0.007  |
| Poor reperfusion, n(%)         | 2.533         | 1.523-4.213  | <0.001 | 2.719               | 1.706-4.336  | <0.001 |
| NIHSS on admission             |               |              | <0.001 |                     |              | <0.05  |
| 0-8*, n(%)                     |               |              |        |                     |              |        |
| 9-16, n(%)                     | 3.210         | 0.940-10.955 | 0.063  | 3.459               | 1.031-11.610 | 0.045  |
| >16, n(%)                      | 7.901         | 2.394-26.081 | 0.001  | 8.052               | 4.409-14.705 | 0.001  |
| hs-cTnI dynamic changes, n (%) | 1.753         | 1.097-2.800  | 0.019  | 1.597               | 1.022-2.495  | 0.040  |
| sICH, n%                       | 2.621         | 1.625-4.229  | <0.001 | 2.259               | 1.447-3.529  | <0.001 |

aHR, adjusted hazard ratio; CI, confidence interval; IV rtPA, use of intravenous recombinant tissue plasminogen activator; NIHSS, National Institutes of Health Stroke Scale score; hs-cTnI, high-sensitivity cardiac troponin; sICH, symptomatic intracranial hemorrhage.

\*control group

Figure.S3 Differences in 90-day mortality between groups with non-dynamic, rising and falling dynamic changes.

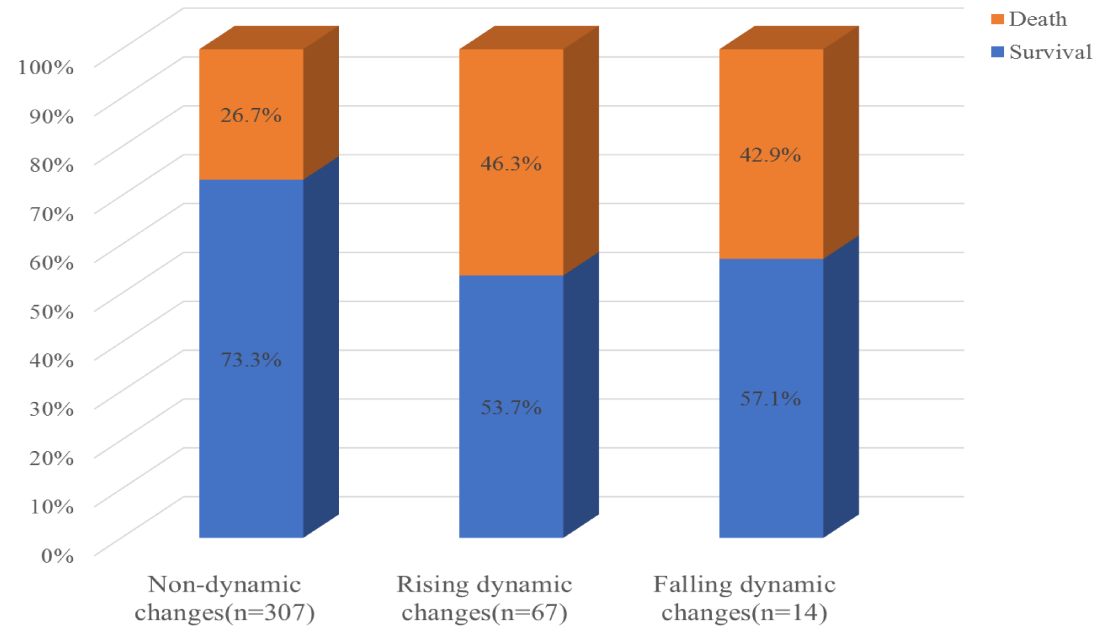

Notes: The proportions of lost to following-up were 26/333(7.8%) in Non-dynamic changes, 8/75(10.7%) in Rising dynamic changes, 1/15(6.7%) in Falling dynamic changes, respectively.

Table S8. Subgroup analysis to identify relationships between hs-cTnI dynamic changes and mortality

|             | aHR   | 95% CI      | P            | P for interaction |
|-------------|-------|-------------|--------------|-------------------|
| Age, years  |       |             |              | 0.023             |
| ≤ 70        |       |             | >0.05        |                   |
| > 70        |       |             | >0.05        |                   |
| Sex, n%     |       |             |              | >0.05             |
| Female      | 2.833 | 1.338-5.996 | <b>0.007</b> |                   |
| Male        |       |             | >0.05        |                   |
| AF, n%      |       |             |              | >0.05             |
| No          | 2.041 | 1.028-4.053 | 0.042        |                   |
| Yes         |       |             | >0.05        |                   |
| CAD, n%     |       |             |              | >0.05             |
| No          |       |             | >0.05        |                   |
| Yes         |       |             | >0.05        |                   |
| NIHSS score |       |             |              | >0.05             |

|                               |       |             |              |       |
|-------------------------------|-------|-------------|--------------|-------|
| ≤ 8*                          |       |             | >0.05        |       |
| 9-16                          |       |             | >0.05        |       |
| >16                           |       |             | >0.05        |       |
| Insula lesion, n%             |       |             |              | >0.05 |
| No                            | 1.801 | 1.119-2.898 | <b>0.015</b> |       |
| Yes                           |       |             | >0.05        |       |
| posterior circulation, n%     |       |             |              | >0.05 |
| No                            | 2.850 | 1.522-5.336 | <b>0.001</b> |       |
| Yes                           |       |             | >0.05        |       |
| sICH, n%                      |       |             |              | >0.05 |
| No                            | 2.631 | 1.433-4.831 | <b>0.002</b> |       |
| Yes                           |       |             | >0.05        |       |
| Dual antiplatelet therapy, n% |       |             |              | >0.05 |
| No                            |       |             | >0.05        |       |
| Yes                           |       |             | >0.05        |       |

---

hs-cTnI, high-sensitivity cardiac troponin; aHR, adjusted hazard ratio; CI, confidence interval; AF, atrial fibrillation; CAD, coronary artery disease; NIHSS, National

Institutes of Health Stroke Scale score; sICH, symptomatic intracranial hemorrhage.

\*control group
